# Supplementary material for: Separation of Flavonoids and Purification of Chlorogenic Acid from Bamboo Leaves Extraction Residues by Combination of Macroporous Resin and High-Speed Counter-Current Chromatography
Source: MDPI journal article supplement (doi:10.3390/molecules28114443), 2023-05-30
Supplement: s1 [file s1]

## Supplementary material

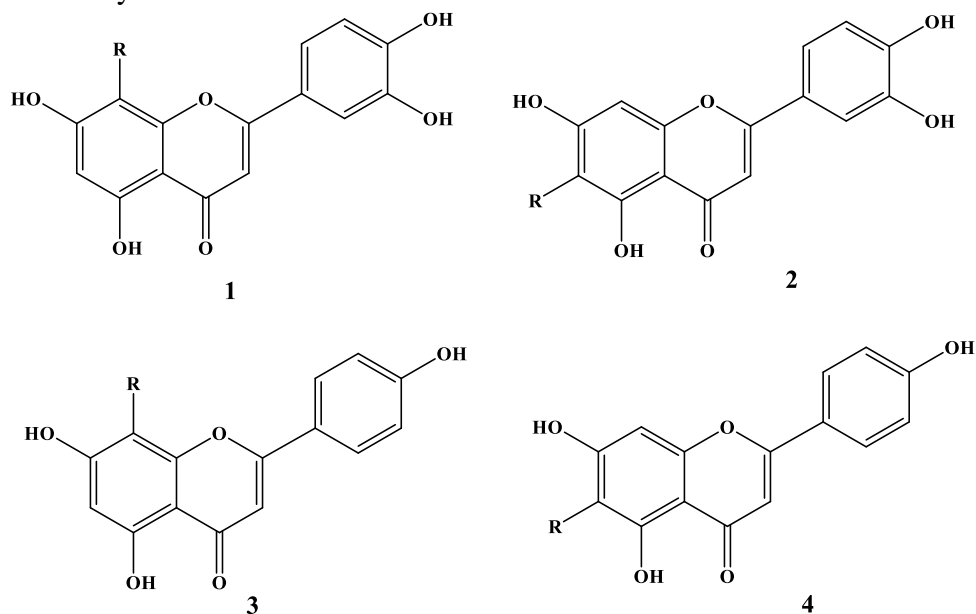

**Figure S1** The molecular structure of the four flavonoids: 1- orientin (OR), 2- isorientin (IOR), 3- vitexin (VI), 4- isovitexin (IVI); R=  $\beta$ -D-glucopyranosyl

(A)

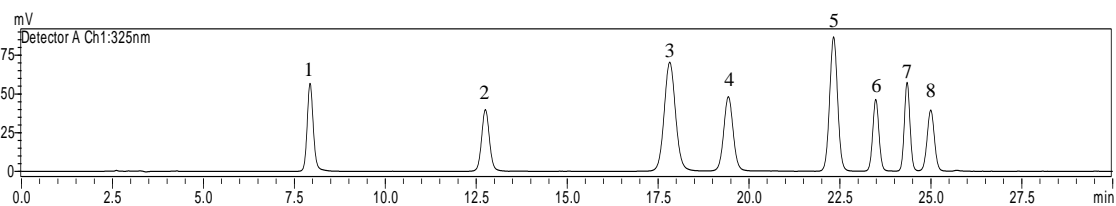

(B)

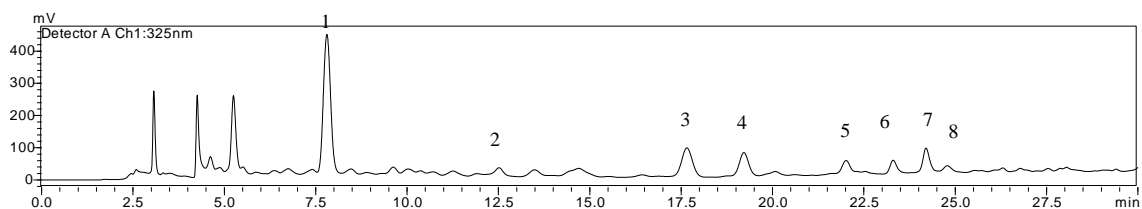

(C)

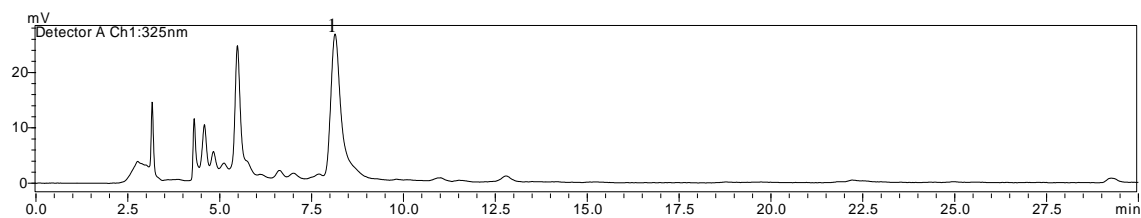

(D)

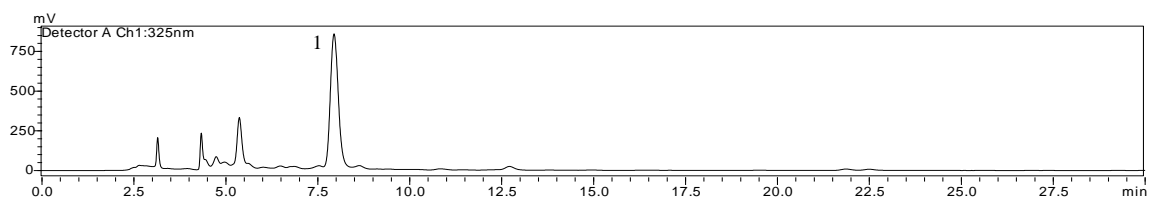

(E)

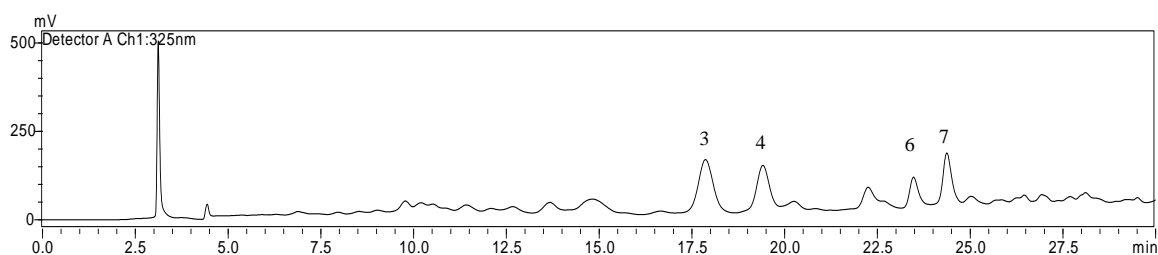

**Figure S2** HPLC chromatograms of mixed standards (A), sample solution (B) and different eluting fractions from XAD-7HP in the scale-up dynamic enrichment experiment: sample loading effluent (C); water eluting fraction (D) and 60% ethanol eluting fraction (E).  
1- chlorogenic acid (CA), 2- caffeic acid, 3- isoorientin (IOR), 4- orientin (OR), 5- p-coumaric acid, 6- vitexin (VI), 7- isovitexin (IVI), 8- ferulic acid

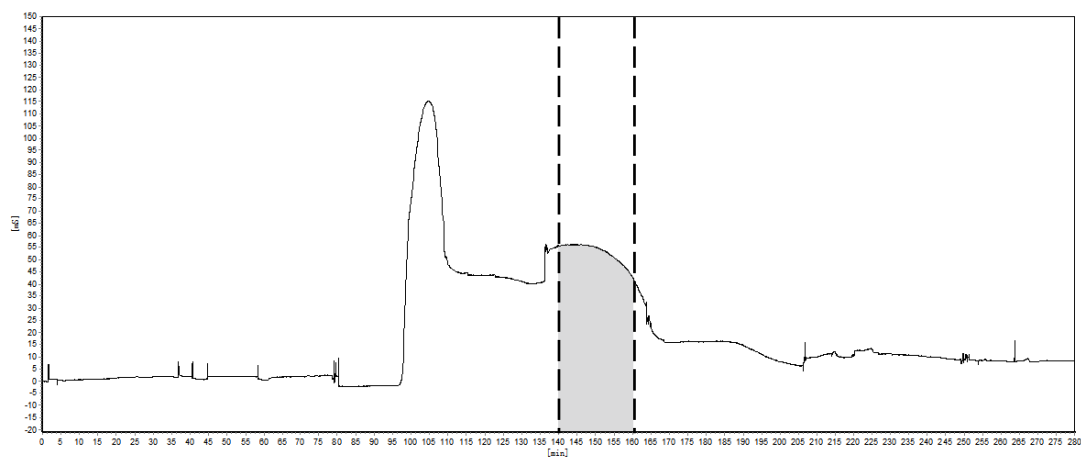

**Figure S3** HSCCC separation chromatograms for CA from XAD-7HP resin

**(A)**

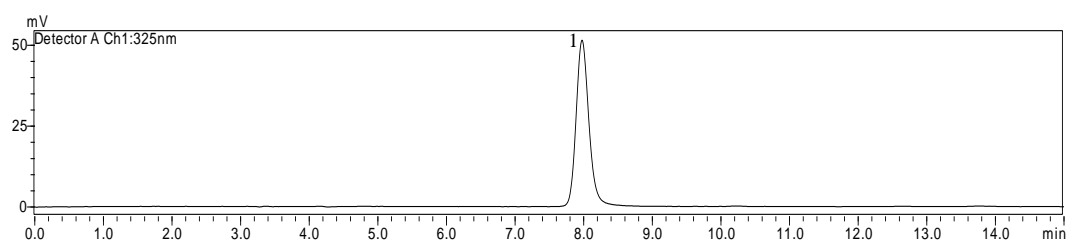

**(B)**

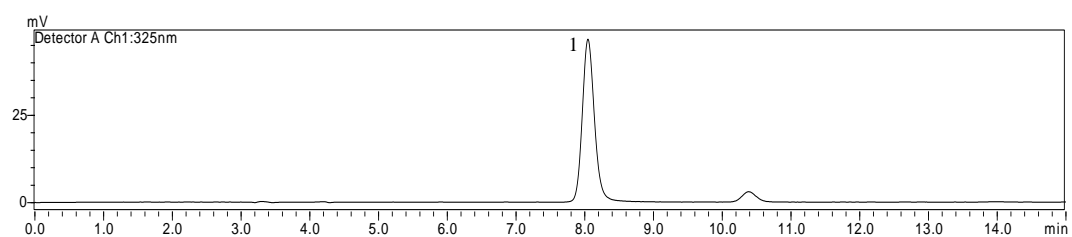

**Figure S4** HPLC chromatograms of CA standard (A) and the isolated CA fraction by HSCCC (B).  
1- chlorogenic acid (CA)
